# Supplementary material for: The Effect of Food Vouchers and an Educational Intervention on Promoting Healthy Eating in Vulnerable Families: A Pilot Study
Source: MDPI journal article supplement (doi:10.3390/nu14234980), 2022-11-23
Supplement: s1 [file s1]

# Supplementary Materials

**Table S1.** Mean and SD values of other biochemical parameters before and after the intervention.

|                                           | Pre-intervention |                  | Post-intervention |                  |
|-------------------------------------------|------------------|------------------|-------------------|------------------|
|                                           | Control= 32      | Intervention= 34 | Control= 32       | Intervention= 34 |
| N=66                                      | Mean (SD)        | Mean (SD)        | Mean (SD)         | Mean (SD)        |
| Red blood cells<br>106/ $\mu$ L           | 4.79 (0.46)      | 4.93 (0.39)      | 4.79 (0.45)       | 4.87 (0.37)      |
| Haemoglobin<br>(g/dl)                     | 13.60 (1.27)     | 13.94 (1.18)     | 13.59 (1.17)      | 13.70 (1.21)     |
| Haematocrit (%)                           | 40.97 (3.88)     | 41.86 (3.57)     | 40.81 (3.52)      | 41.73 (1.18)     |
| Leucocytes 103/ $\mu$ L                   | 7.11 (1.35)      | 7.26 (2.15)      | 7.64 (1.89)       | 6.83 (2.06)      |
| Erythrocyte<br>Sedimentation<br>Rate (mm) | 6.61 (5.79)      | 6.94 (5.24)      | 8.86 (9.70)       | 6.64 (4.96)      |
| Platelets 103/ $\mu$ L                    | 294.81 (69.00)   | 289.00 (66.55)   | 292.21 (71.38)    | 275.52 (64.76)   |
| BUN (mg/dL)                               | 13.21 (4.04)     | 14.85 (4.18)     | 14.22 (5.28)      | 13.87 (3.66)     |
| Creatinine<br>(mg/dL)                     | 0.58 (0.16)      | 0.62 (0.23)      | 0.61 (0.17)       | 0.65 (0.20)      |
| Bilirubin (mg/dL)                         | 0.55 (0.19)      | 0.66 (0.42)      | 0.60 (0.22)       | 0.70 (0.31)      |
| Alkaline<br>Phosphatase (U/L<br>at 37°C)  | 147.70 (81.62)   | 152.67 (105.69)  | 145.07 (79.00)    | 149.94 (98.49)   |
